# Supplementary material for: Diagnostic and prognostic value of circulating tumor DNA in gastric cancer: a meta-analysis
Source: PubMed Central journal article supplement (PMC5351635; doi:10.18632/oncotarget.14064), 2016-12-21
Supplement: oncotarget-08-6330-s001.pdf [file oncotarget-08-6330-s001.pdf]

## Diagnostic and prognostic value of circulating tumor DNA in gastric cancer: a meta-analysis

### Supplementary Materials

**Supplementary Table S1: Information of included genes and their main functions**

|            | Full name                                                | Gene function           | Gene location |
|------------|----------------------------------------------------------|-------------------------|---------------|
| APC        | APC                                                      | Signal transduction     | 5q22.2        |
| BCL6B      | B-cell CLL/lymphoma 6B                                   | Signal transduction     | 17p13.1       |
| E-cadherin | E-cadherin                                               | Adhesion/invasiveness   | 16q22.1       |
| MINT2      | Amyloid beta precursor protein binding family A member 2 | Signal transduction     | 15q11-q12     |
| OSR2       | Odd-skipped related transcription factor 2               | Apoptosis/Proliferation | 8q22.2        |
| P16        | Cyclin dependent kinase inhibitor 2A                     | Signal transduction     | 9p21          |
| PCDH10     | Protocadherin 10                                         | Adhesion/Invasiveness   | 4q28.3        |
| PPFIA3     | PTPRF interacting protein alpha 3                        | Apoptosis/Proliferation | 19q13.33      |
| RASSF1A    | Ras association domain family member 1                   | Apoptosis/Proliferation | 3p21.3        |
| RUNX3      | Runt related transcription factor 3                      | Apoptosis/Proliferation | 1p36          |
| SFRP1      | Secreted frizzled related protein 1                      | Signal transduction     | 8p11.21       |
| SOX17      | SRY-box 17                                               | Adhesion/Invasiveness   | 8q11.23       |
| SPG20      | Spastic paraplegia 20                                    | Signal transduction     | 13q13.3       |
| TFPI2      | Tissue factor pathway inhibitor-2                        | Signal transduction     | 7q22          |
| TIMP3      | TIMP metalloproteinase inhibitor 3                       | Adhesion/Invasiveness   | 22q12.3       |
| VAV3       | Vav guanine nucleotide exchange factor 3                 | Signal transduction     | 1p13.3        |
| XAF1       | XIAP associated factor 1                                 | Apoptosis/Proliferation | 17p13.1       |

**Supplementary Table S2: Results of diagnosis quality assessment of included studies according to the QUADAS-2 tool criteria L: low risk of bias; H: high risk of bias; U: unclear risk of bias**

| Study                          | Risk of Bias       |            |                    |               | Applicability Concerns |            |                    |
|--------------------------------|--------------------|------------|--------------------|---------------|------------------------|------------|--------------------|
|                                | Patients Selection | Index Test | Reference Standard | Flow and Time | Patients Selection     | Index Test | Reference Standard |
| WK Leung <sup>8</sup>          | L                  | L          | U                  | L             | H                      | L          | L                  |
| Mohammad R.A. <sup>9</sup>     | L                  | L          | L                  | U             | L                      | L          | L                  |
| Wang YC <sup>10</sup>          | L                  | L          | U                  | L             | L                      | L          | L                  |
| Chouhei.S <sup>11</sup>        | L                  | L          | L                  | L             | L                      | H          | L                  |
| Kenji H. <sup>12</sup>         | H                  | H          | L                  | L             | H                      | L          | L                  |
| Ioanna B. <sup>13</sup>        | H                  | L          | L                  | L             | H                      | L          | L                  |
| Yang QF <sup>14</sup>          | L                  | L          | L                  | L             | L                      | L          | L                  |
| Zhi QL <sup>15</sup>           | L                  | L          | L                  | L             | L                      | L          | L                  |
| Han J <sup>16</sup>            | L                  | L          | L                  | L             | L                      | L          | L                  |
| Wu YC <sup>17</sup>            | L                  | L          | L                  | H             | L                      | L          | L                  |
| Yu JL <sup>18</sup>            | L                  | L          | L                  | L             | H                      | L          | L                  |
| Zhang H <sup>19</sup>          | L                  | L          | L                  | L             | L                      | L          | L                  |
| Chang L <sup>20</sup>          | L                  | L          | L                  | L             | L                      | L          | L                  |
| Ioanna B. (2015) <sup>21</sup> | H                  | L          | L                  | H             | H                      | L          | L                  |
| Charinya P <sup>22</sup>       | L                  | L          | L                  | L             | L                      | L          | L                  |
| Li WH <sup>23</sup>            | L                  | L          | L                  | L             | L                      | L          | L                  |

**Supplementary Table S3: The assessment of quality of each study according to the newcastle-ottawa scale**

| Study                          | Selection(0-4) |      |    |      | Comparability |     | Outcome (0-3) |    |     | Total |
|--------------------------------|----------------|------|----|------|---------------|-----|---------------|----|-----|-------|
|                                | REC            | Snec | AE | OINP | SCB           | SCA | AO            | FU | AFC |       |
| WK Leung <sup>8</sup>          | 1              | 0    | 1  | 1    | 1             | 0   | 1             | 1  | 1   | 7     |
| Mohammad R.A. <sup>9</sup>     | 1              | 1    | 1  | 1    | 1             | 1   | 0             | 0  | 0   | 6     |
| Wang YC <sup>10</sup>          | 1              | 1    | 1  | 0    | 1             | 0   | 1             | 0  | 0   | 5     |
| Chouhei.S <sup>11</sup>        | 1              | 1    | 1  | 0    | 1             | 0   | 1             | 0  | 0   | 5     |
| Kenji H. <sup>12</sup>         | 1              | 1    | 1  | 0    | 1             | 1   | 0             | 0  | 0   | 5     |
| Ioanna B. <sup>13</sup>        | 1              | 1    | 1  | 1    | 1             | 0   | 1             | 1  | 0   | 7     |
| Yang QF <sup>14</sup>          | 1              | 1    | 1  | 0    | 1             | 0   | 1             | 1  | 0   | 6     |
| Zhi QL <sup>15</sup>           | 1              | 1    | 1  | 1    | 1             | 1   | 1             | 1  | 0   | 8     |
| Han J <sup>16</sup>            | 1              | 1    | 1  | 0    | 1             | 0   | 1             | 1  | 0   | 6     |
| Wu YC <sup>17</sup>            | 1              | 1    | 1  | 0    | 1             | 1   | 1             | 1  | 0   | 7     |
| Yu JL <sup>18</sup>            | 1              | 1    | 1  | 1    | 1             | 1   | 1             | 1  | 0   | 8     |
| Zhang H <sup>19</sup>          | 1              | 1    | 1  | 0    | 1             | 0   | 1             | 1  | 0   | 7     |
| Chang L <sup>20</sup>          | 1              | 1    | 1  | 0    | 1             | 0   | 1             | 0  | 0   | 5     |
| Ioanna B. (2015) <sup>21</sup> | 1              | 1    | 1  | 1    | 1             | 0   | 1             | 1  | 1   | 8     |
| Charinya P <sup>22</sup>       | 1              | 1    | 1  | 1    | 1             | 1   | 1             | 1  | 0   | 8     |
| Li WH <sup>23</sup>            | 1              | 1    | 1  | 0    | 1             | 0   | 1             | 0  | 0   | 5     |

REC: representativeness of the exposed cohort; SNEC: selection of the nonexposed cohort; AE: ascertainment of exposure; OINP: outcome of interest not presented in the start of study; SCB: study controls for basic characteristics; SCA: study controls for additional factor; AO: assessment of outcome; FU: follow-up; AFC: adequacy of follow up.
